# Supplementary material
Source: PubMed Central journal article supplement (PMC4783191)

Figure 1

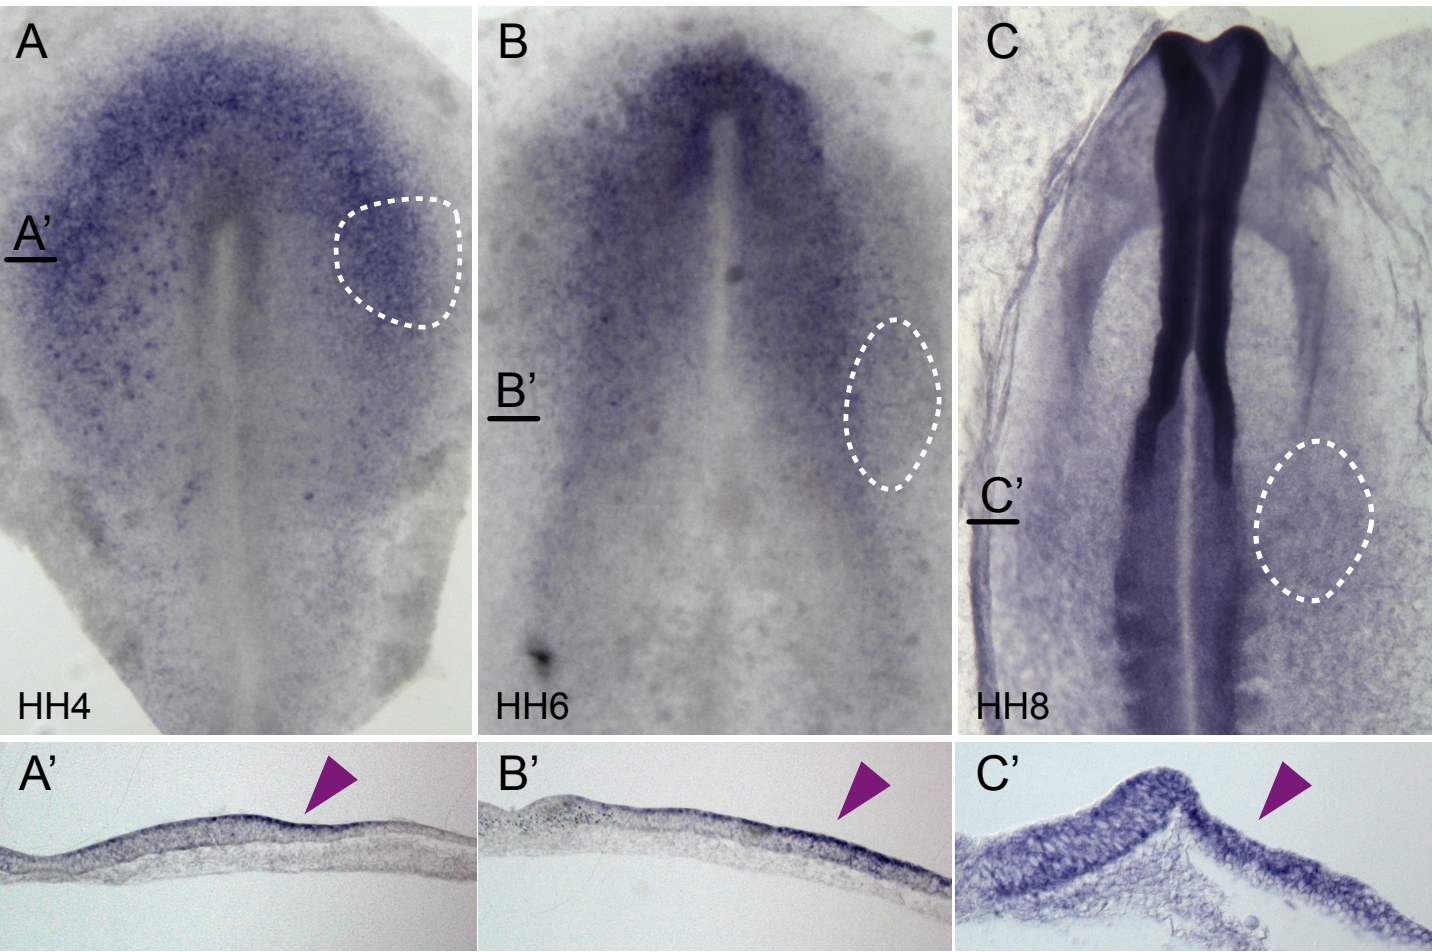

Figure 2

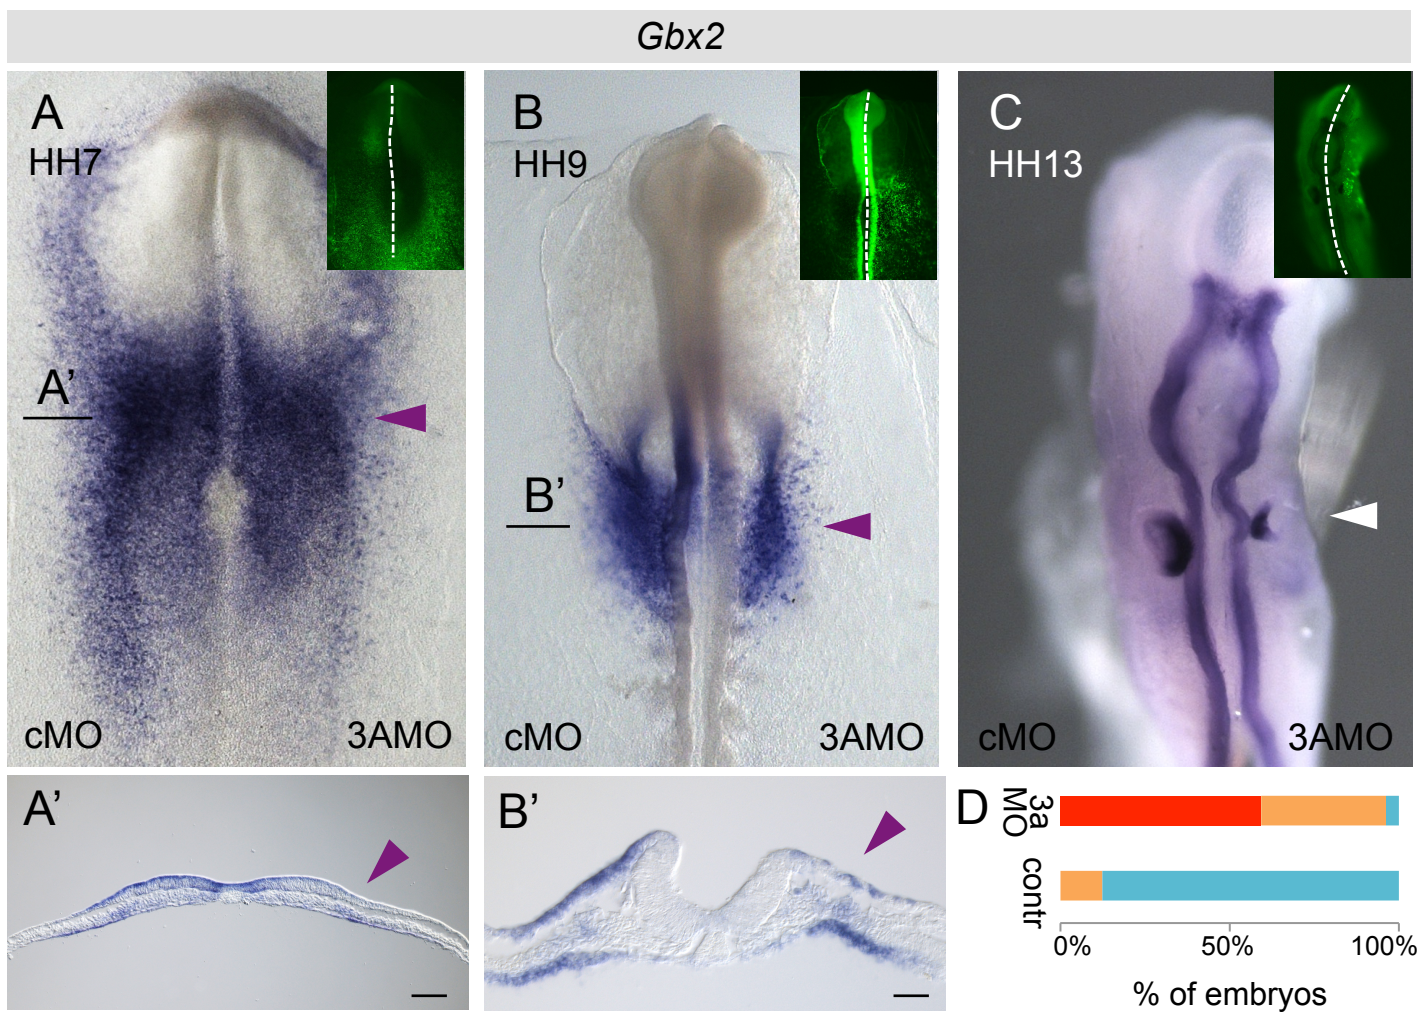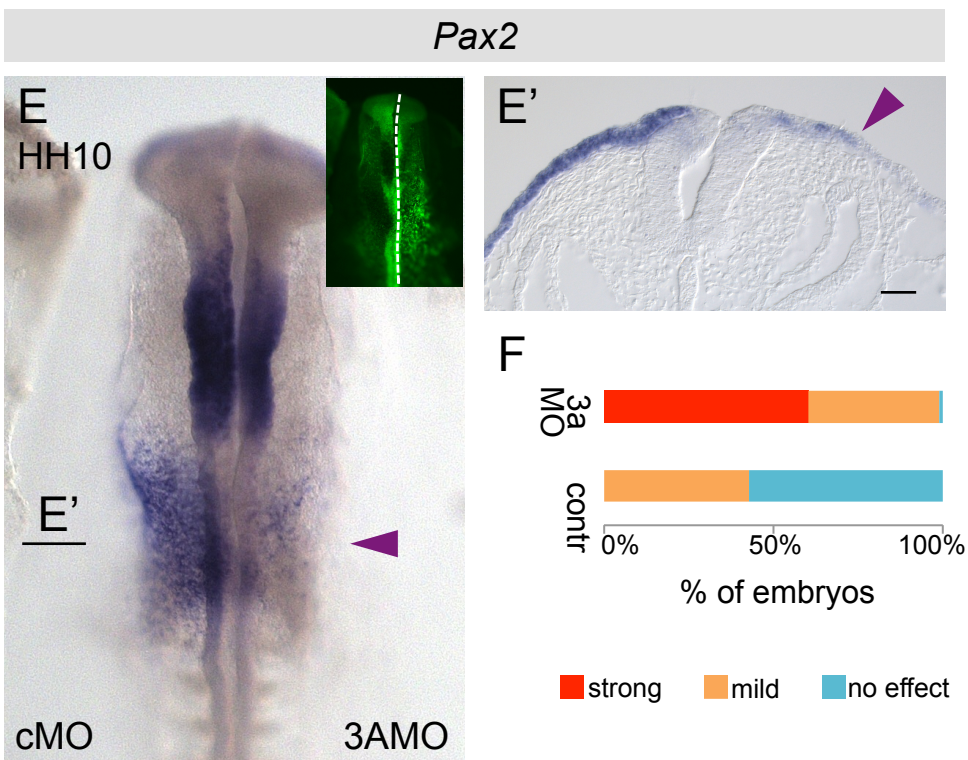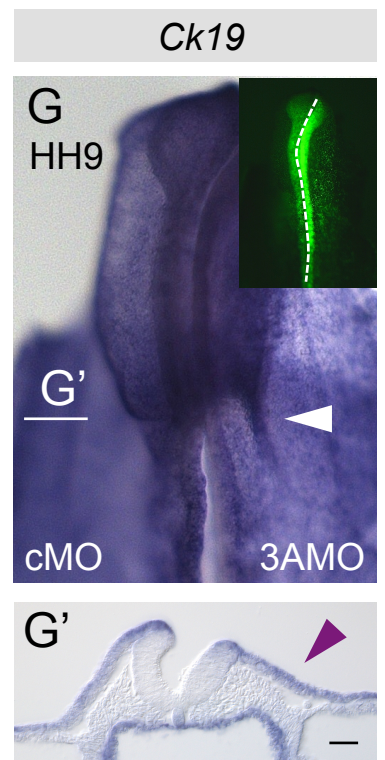

Figure 3

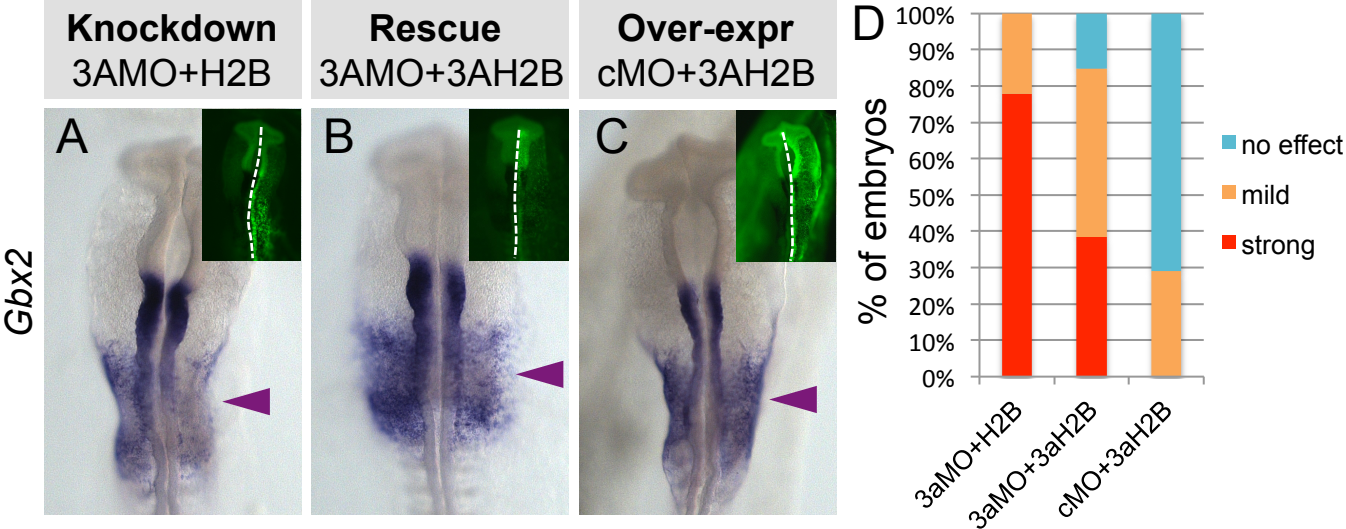

Figure 4

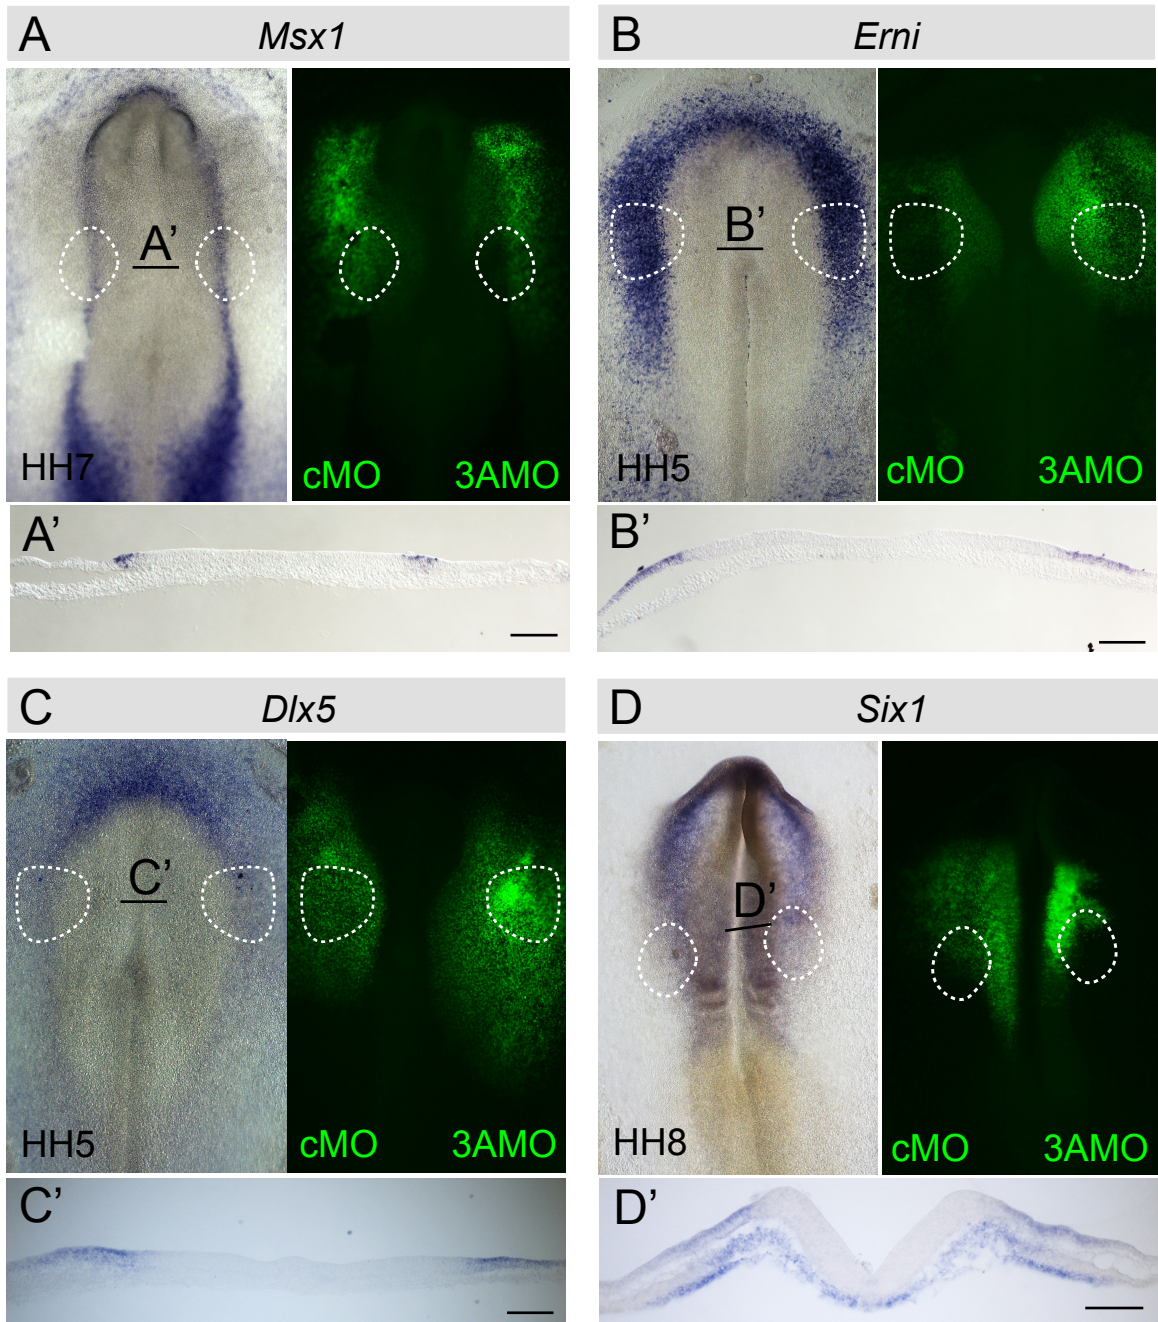

Figure 5

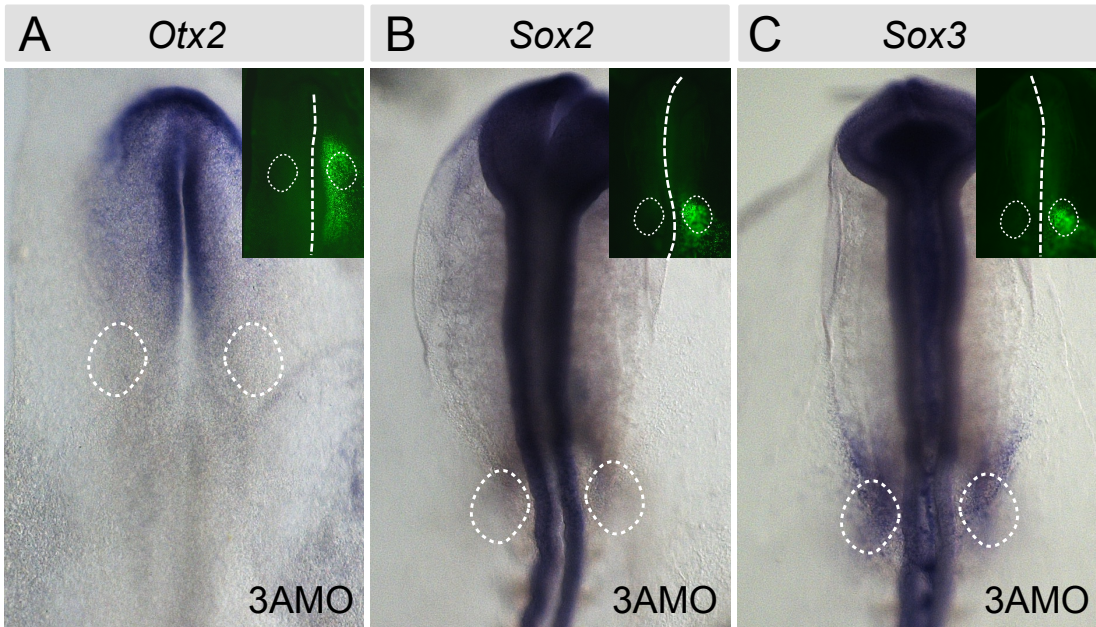

D

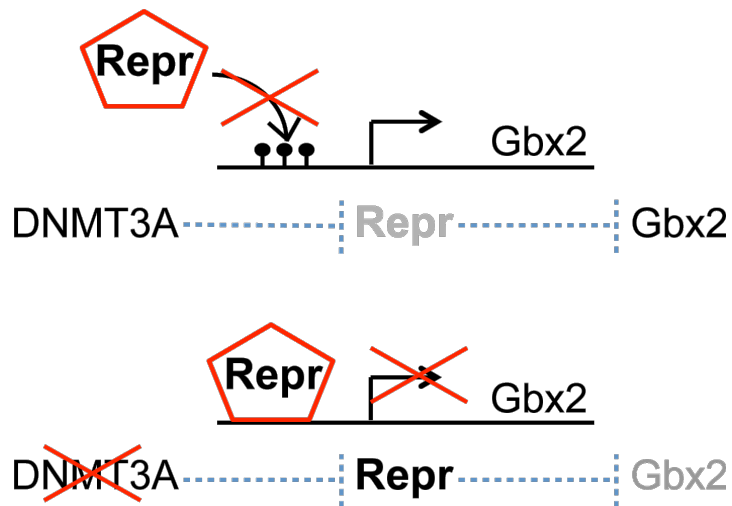

Figure S1

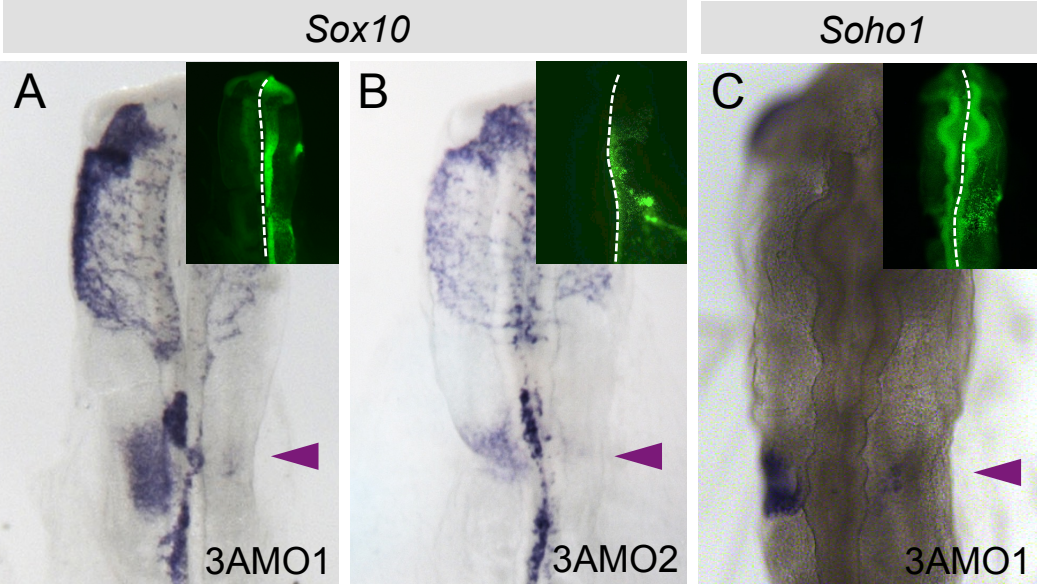

Figure S2

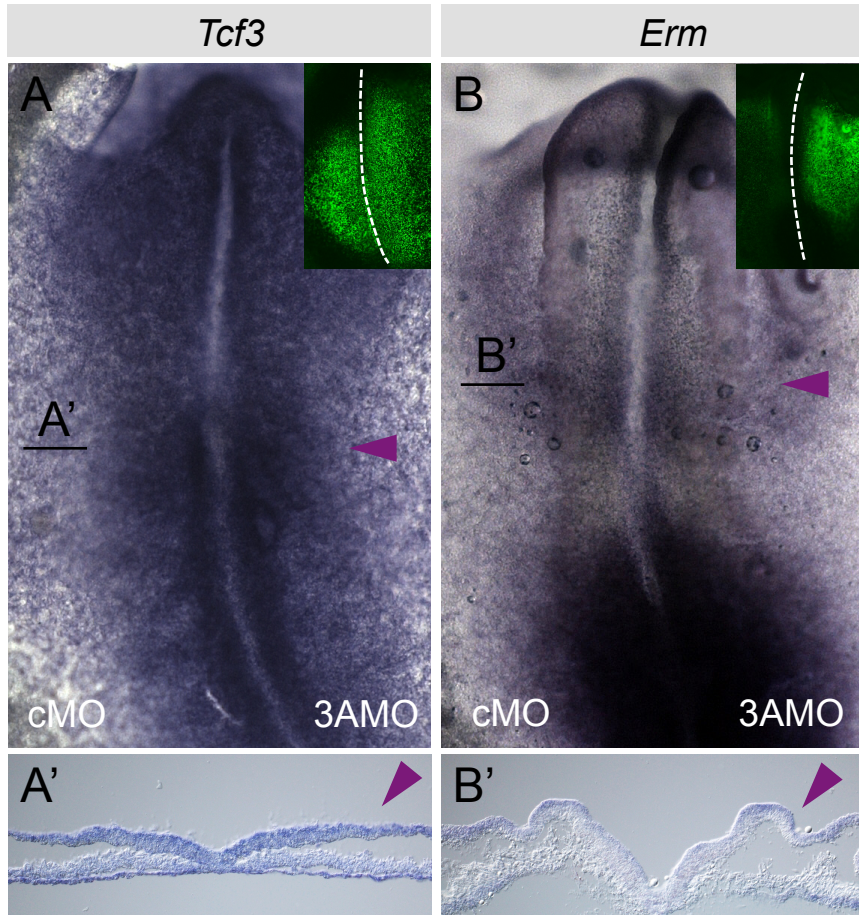

Supplement: NIHMS757595-supplement.pdf [file NIHMS757595-supplement.pdf]
